# Supplementary material for: Modifications Induced by Rootstocks on Yield, Vigor and Nutritional Status on Vitis vinifera Cv Syrah under Hyper-Arid Conditions in Northern Chile
Source: MDPI journal article supplement (doi:10.3390/agronomy11050979), 2021-05-14
Supplement: s1 [file s1]

## Supplementary file

**Supplementary Table 1: Interaction effect between Rootstock and Season for Mg petiole concentration.**

| Rootstock x Season | Mg (%)          |
|--------------------|-----------------|
| OR*2003-04         | 0.712 a         |
| 140 Ru*2006-07     | 0.552 b         |
| OR*2004-05         | 0.551 b         |
| St. George*2006-07 | 0.516 bc        |
| Harmony*2006-07    | 0.514 bc        |
| OR*2007-08         | 0.505 bcd       |
| OR*2005-06         | 0.503 bcd       |
| Harmony*2003-04    | 0.497 bcde      |
| 99 Ri*2006-07      | 0.491 bcdef     |
| Harmony*2005-06    | 0.490 bcdef     |
| Harmony*2004-05    | 0.489 bcdef     |
| St. George*2003-04 | 0.487 bcdefg    |
| 1103 P*2005-06     | 0.487 bcdefg    |
| 99 Ri*2003-04      | 0.487 bcdefg    |
| 1103 P*2006-07     | 0.486 bcdefg    |
| OR*2006-07         | 0.486 bcdefg    |
| 1103 P*2003-04     | 0.481 bcdefgh   |
| St. George*2004-05 | 0.478 bcdefgh   |
| 140 Ru*2005-06     | 0.462 bcdefghi  |
| 1103 P*2004-05     | 0.457 bcdefghi  |
| 140 Ru*2004-05     | 0.454 bcdefghij |
| 99 Ri*2005-06      | 0.452 bcdefghij |
| 140 Ru*2003-04     | 0.451 bcdefghij |
| Harmony*2007-08    | 0.449 bcdefghij |
| 140 Ru*2007-08     | 0.448 bcdefghij |

|                    |                   |
|--------------------|-------------------|
| 99 Ri*2004-05      | 0.438 bcdefghijk  |
| St. George*2005-06 | 0.432 bcdefghijk  |
| 99 Ri*2007-08      | 0.429 bcdefghijk  |
| Salt Creek*2006-07 | 0.418 bcdefghijkl |
| 1103 P*2007-08     | 0.415 bcdefghijkl |
| St. George*2007-08 | 0.407 cdefghijkl  |
| Salt Creek*2007-08 | 0.379 cdefghijkl  |
| Freedom*2006-07    | 0.376 defghijkl   |
| SO4*2006-07        | 0.373 defghijkl   |
| Salt Creek*2005-06 | 0.365 efghijkl    |
| Freedom*2007-08    | 0.359 fghijkl     |
| Salt Creek*2003-04 | 0.356 fghijkl     |
| Freedom*2004-05    | 0.352 ghijkl      |
| Freedom*2005-06    | 0.347 hijkl       |
| SO4*2007-08        | 0.337 ijkl        |
| Salt Creek*2004-05 | 0.326 ijkl        |
| SO4*2003-04        | 0.319 jkl         |
| SO4*2005-06        | 0.302 kl          |
| Freedom*2003-04    | 0.292 l           |
| SO4*2004-05        | 0.288 l           |

For a given factor and significance  $p < 0.05$ , different letters within a column represent significant differences (Tukey's test,  $p < 0.05$ ).

**Supplementary Table 2: Pearson's correlation matrix obtained from Principal Component Analysis of performed on variables measured as a function of rootstocks (Figure 1).**

| Variables | N        | P        | K            | Ca           | Mg       | Zinc     | Mn       | Cu       | N° Bu         | Yi            | Bu W         | P W          | Ravaz I       | Bu           | Fru           | S TC         |
|-----------|----------|----------|--------------|--------------|----------|----------|----------|----------|---------------|---------------|--------------|--------------|---------------|--------------|---------------|--------------|
| N         | <b>1</b> | 0.666    | <b>0.702</b> | <b>0.818</b> | 0.051    | -0.129   | 0.089    | -0.049   | <b>-0.853</b> | <b>-0.848</b> | -0.637       | 0.566        | <b>-0.808</b> | -0.598       | <b>-0.697</b> | -0.157       |
| P         |          | <b>1</b> | -0.030       | 0.384        | -0.169   | 0.283    | 0.621    | 0.243    | -0.635        | -0.535        | -0.310       | <b>0.785</b> | <b>-0.836</b> | -0.356       | -0.073        | -0.453       |
| K         |          |          | <b>1</b>     | <b>0.757</b> | 0.443    | -0.549   | -0.294   | -0.286   | -0.569        | <b>-0.668</b> | -0.576       | -0.083       | -0.213        | -0.403       | <b>-0.839</b> | 0.373        |
| Ca        |          |          |              | <b>1</b>     | 0.089    | -0.466   | 0.090    | -0.299   | <b>-0.753</b> | <b>-0.755</b> | -0.464       | 0.343        | -0.561        | -0.592       | <b>-0.912</b> | 0.210        |
| Mg        |          |          |              |              | <b>1</b> | -0.585   | 0.295    | -0.016   | -0.063        | -0.148        | -0.133       | -0.595       | 0.435         | 0.339        | -0.060        | <b>0.667</b> |
| Zinc      |          |          |              |              |          | <b>1</b> | -0.081   | 0.491    | 0.229         | 0.213         | -0.172       | 0.572        | -0.329        | -0.298       | 0.574         | -0.516       |
| Mn        |          |          |              |              |          |          | <b>1</b> | 0.275    | -0.255        | -0.129        | 0.186        | 0.202        | -0.189        | 0.185        | 0.260         | 0.101        |
| Cu        |          |          |              |              |          |          |          | <b>1</b> | 0.222         | 0.341         | 0.215        | 0.397        | -0.162        | 0.121        | 0.536         | 0.076        |
| N° Bu     |          |          |              |              |          |          |          |          | <b>1</b>      | <b>0.959</b>  | 0.534        | -0.378       | <b>0.747</b>  | 0.591        | 0.615         | 0.217        |
| Yi        |          |          |              |              |          |          |          |          |               | <b>1</b>      | <b>0.726</b> | -0.288       | 0.662         | <b>0.677</b> | 0.663         | 0.142        |
| Bu W      |          |          |              |              |          |          |          |          |               |               | <b>1</b>     | -0.260       | 0.432         | <b>0.777</b> | 0.429         | 0.071        |
| P W       |          |          |              |              |          |          |          |          |               |               |              | <b>1</b>     | <b>-0.886</b> | -0.553       | -0.106        | -0.461       |
| Ravaz I   |          |          |              |              |          |          |          |          |               |               |              |              | <b>1</b>      | 0.663        | 0.360         | 0.503        |
| Bu        |          |          |              |              |          |          |          |          |               |               |              |              |               | <b>1</b>     | 0.497         | 0.152        |
| Fru       |          |          |              |              |          |          |          |          |               |               |              |              |               |              | <b>1</b>      | -0.183       |
| S TC      |          |          |              |              |          |          |          |          |               |               |              |              |               |              |               | <b>1</b>     |

Values in bold are statistically significant (p value < 0.05).

**Supplementary Table 3: Pearson's correlation matrix obtained from Principal Component Analysis performed on variables measured as a function of Season (Figure 2).**

| Variables | N        | P        | K        | Ca       | Mg       | Zinc         | Mn       | Cu           | Nº Bu    | Yi            | Bu W         | P W      | Ravaz I       | Bu       | Fru          | S TC          |
|-----------|----------|----------|----------|----------|----------|--------------|----------|--------------|----------|---------------|--------------|----------|---------------|----------|--------------|---------------|
| N         | <b>1</b> | 0.218    | 0.156    | 0.839    | 0.748    | 0.399        | 0.592    | <b>0.881</b> | -0.478   | -0.218        | -0.055       | -0.366   | 0.004         | -0.126   | -0.434       | -0.203        |
| P         |          | <b>1</b> | 0.409    | 0.196    | -0.355   | <b>0.929</b> | -0.526   | 0.226        | -0.358   | -0.568        | -0.501       | -0.389   | -0.272        | -0.722   | -0.640       | 0.698         |
| K         |          |          | <b>1</b> | 0.626    | 0.275    | 0.356        | -0.523   | 0.515        | -0.821   | <b>-0.955</b> | -0.746       | 0.589    | <b>-0.962</b> | 0.296    | 0.343        | 0.786         |
| Ca        |          |          |          | <b>1</b> | 0.835    | 0.347        | 0.260    | <b>0.974</b> | -0.754   | -0.631        | -0.423       | 0.161    | -0.522        | 0.252    | 0.011        | 0.168         |
| Mg        |          |          |          |          | <b>1</b> | -0.175       | 0.641    | 0.801        | -0.501   | -0.194        | -0.017       | 0.233    | -0.225        | 0.544    | 0.247        | -0.324        |
| Zinc      |          |          |          |          |          | <b>1</b>     | -0.391   | 0.442        | -0.248   | -0.581        | -0.619       | -0.385   | -0.259        | -0.619   | -0.634       | 0.618         |
| Mn        |          |          |          |          |          |              | <b>1</b> | 0.287        | 0.075    | 0.585         | 0.672        | -0.384   | 0.600         | 0.098    | -0.187       | <b>-0.903</b> |
| Cu        |          |          |          |          |          |              |          | <b>1</b>     | -0.603   | -0.581        | -0.462       | 0.062    | -0.431        | 0.183    | -0.086       | 0.134         |
| Nº Bu     |          |          |          |          |          |              |          |              | <b>1</b> | 0.704         | 0.305        | -0.242   | 0.653         | -0.109   | -0.063       | -0.414        |
| Yi        |          |          |          |          |          |              |          |              |          | <b>1</b>      | <b>0.888</b> | -0.466   | <b>0.931</b>  | -0.155   | -0.185       | -0.864        |
| Bu W      |          |          |          |          |          |              |          |              |          |               | <b>1</b>     | -0.470   | 0.824         | -0.173   | -0.211       | -0.851        |
| P W       |          |          |          |          |          |              |          |              |          |               |              | <b>1</b> | -0.751        | 0.874    | <b>0.954</b> | 0.370         |
| Ravaz I   |          |          |          |          |          |              |          |              |          |               |              |          | <b>1</b>      | -0.457   | -0.524       | -0.798        |
| Bu        |          |          |          |          |          |              |          |              |          |               |              |          |               | <b>1</b> | <b>0.937</b> | -0.090        |
| Fru       |          |          |          |          |          |              |          |              |          |               |              |          |               |          | <b>1</b>     | 0.095         |
| S TC      |          |          |          |          |          |              |          |              |          |               |              |          |               |          |              | <b>1</b>      |

Values in bold are statistically significant (p value < 0.05).
